# Supplementary material for: Chimeric antigen receptors containing the OX40 signalling domain enhance the persistence of T cells even under repeated stimulation with multiple myeloma target cells
Source: PubMed Central journal article supplement (PMC8974082; doi:10.1186/s13045-022-01244-0), 2022-04-01
Supplement: 13045_2022_1244_MOESM3_ESM.pdf [file 13045_2022_1244_MOESM3_ESM.pdf]

# Supplementary Figure 3

**A**

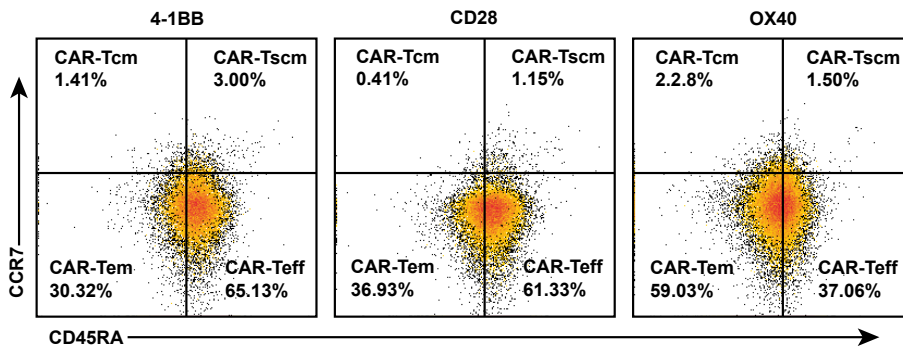

**B**

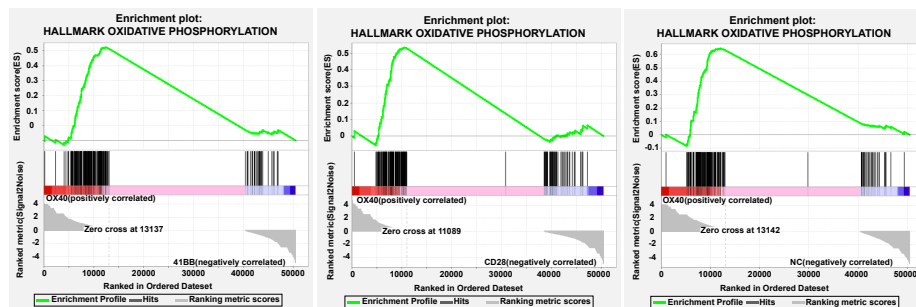

**C**

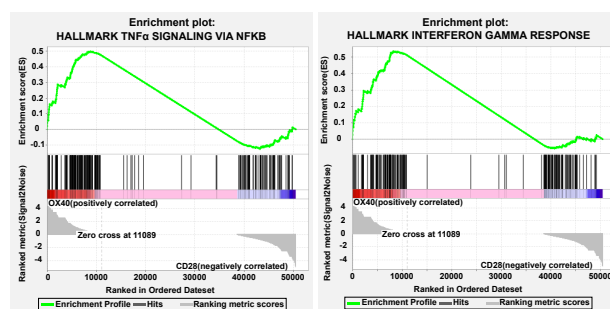

**Supplementary Figure 3: Representative Flow cytometry analysis about CAR-T cells subtypes and Gene set enrichment analysis results.** A: Effector cells were subjected to three consecutive repeated stimulations with 8226 target cells (CAR+ cells and 8226 target cells at a ratio of 1:1; a 3-day interval was used for each stimulation), CAR+ cell subtypes were determined with flow cytometry (n=3). B: GSEA of hypoxia, glycolysis, and fatty acid metabolism and MSigDB hallmark gene set for two different BCMA-targeted CAR-T cells (OX40-CAR-T cells and 41BB-CAR-T cells). C: Representative GSEA of TNF- $\alpha$  signalling via NF $\kappa$ B and the IFN- $\gamma$  response and MSigDB hallmark gene sets for two different BCMA-targeted CAR-T cells (OX40-CAR-T cells and CD28-CAR-T cells).
